# Supplementary material for: FOXO1 regulates uterine epithelial integrity and progesterone receptor expression critical for embryo implantation
Source: PLoS Genet. 2018 Nov 19;14(11):e1007787. doi: 10.1371/journal.pgen.1007787 (PMC6277115; doi:10.1371/journal.pgen.1007787)
Supplement: S3 Table — (XLSX) [file pgen.1007787.s008.xlsx]

## Sheet: S3 Table
Supplemental Table 3. Functional annotation of altered transcriptome in Foxo1d/d mouse uteri at PPD 4.5.
Ingenuity Canonical Pathways	-log(p-Value)	Activation z-score	Molecules
iNOS Signaling	2.23	2.236	IFNG,MYD88,CD14,MAPK13,MAPK11
LPS/IL-1 Mediated Inhibition of RXR Function	2.44	2.236	GSTM1,MYD88,HMGCS2,Sult1d1,IL18RAP,ALDH1A3,NGFR,FABP4,CD14,CHST11,ACSL4,FABP5,ABCC4
HMGB1 Signaling	1.76	2.121	PIK3R3,IFNG,LIF,IRS1,NGFR,IRS2,MAPK13,MAPK11
Th2 Pathway	2.5	2.121	PIK3R3,ITGB2,STAT5A,SOCS3,IFNG,IL4R,IL17RB,IRS1,IRS2,CD3D
BMP signaling pathway	0.903	2	FST,MAPK13,MAPK11,NOG
Toll-like Receptor Signaling	0.888	2	MYD88,CD14,MAPK13,MAPK11
TREM1 Signaling	1.04	2	STAT5A,NLRC5,Naip1,MYD88
Endothelin-1 Signaling	1.78	1.897	PLBD1,PIK3R3,PLA2G4A,IRS1,IRS2,PTGER2,MAPK13,PLA2G7,MAPK11,PAFAH1B3
Osteoarthritis Pathway	1.8	1.897	ELF3,ANKH,PTH1R,ADIPOQ,FZD6,IHH,HTRA1,ALPL,PGF,IL18RAP,SLC39A8
Fc Epsilon RI Signaling	1.62	1.89	PIK3R3,PLA2G4A,VAV3,IRS1,IRS2,MAPK13,MAPK11
FLT3 Signaling in Hematopoietic Progenitor Cells	2.27	1.89	PIK3R3,STAT5A,IRS1,FLT3,IRS2,MAPK13,MAPK11
Mouse Embryonic Stem Cell Pluripotency	1.78	1.89	PIK3R3,LIF,IRS1,FZD6,IRS2,MAPK13,MAPK11
B Cell Receptor Signaling	1.35	1.667	PIK3R3,FOXO1,VAV3,IRS1,PIK3AP1,IRS2,MAPK13,MAP3K5,MAPK11
IL-6 Signaling	2.89	1.667	PIK3R3,SOCS3,IRS1,NGFR,CD14,IRS2,MAPK13,MAPK11,A2M,IL18RAP
Leukocyte Extravasation Signaling	1.84	1.667	PIK3R3,ITGB2,MMP7,VAV3,IRS1,EZR,JAM2,IRS2,MAPK13,MAPK11,CLDN3
Acute Myeloid Leukemia Signaling	1.53	1.633	PIK3R3,STAT5A,IRS1,FLT3,CEBPA,IRS2
CCR3 Signaling in Eosinophils	1.41	1.633	PIK3R3,PLA2G4A,GNB4,IRS1,IRS2,MAPK13,MAPK11
LPS-stimulated MAPK Signaling	2.24	1.633	PIK3R3,IRS1,CD14,IRS2,MAPK13,MAP3K5,MAPK11
Dendritic Cell Maturation	1.47	1.414	PIK3R3,LEPR,MYD88,IRS1,NGFR,IRS2,MAPK13,IRF8,MAPK11
Neuroinflammation Signaling Pathway	2.4	1.387	IFNG,Naip1,GDNF,MYD88,MAPK13,SLC6A13,MAPK11,GABRP,PIK3R3,PLA2G4A,CALB2,IRS1,GLUL,IRS2,CALB1,S100G
CD40 Signaling	1.35	1.342	PIK3R3,IRS1,IRS2,MAPK13,MAPK11
EGF Signaling	1.58	1.342	PIK3R3,IRS1,IRS2,MAPK13,MAPK11
IL-17A Signaling in Airway Cells	1.37	1.342	PIK3R3,IRS1,IRS2,MAPK13,MAPK11
IL-3 Signaling	1.25	1.342	PIK3R3,STAT5A,FOXO1,IRS1,IRS2
Paxillin Signaling	2.76	1.342	PIK3R3,ITGB2,IRS1,ITGA8,IRS2,MAPK13,ITGB6,MAPK11,ITGB7
Tec Kinase Signaling	0.63	1.342	PIK3R3,STAT5A,GNB4,VAV3,IRS1,IRS2
Thrombin Signaling	0.402	1.342	PIK3R3,GNB4,IRS1,IRS2,MAPK13,MAPK11
UVB-Induced MAPK Signaling	1.69	1.342	PIK3R3,IRS1,IRS2,MAPK13,MAPK11
p53 Signaling	1.67	-1.342	PIK3R3,TP53INP1,GADD45A,GADD45G,IRS1,IRS2,DRAM1
PI3K/AKT Signaling	1.01	-1.342	PIK3R3,TSC1,FOXO1,PPP2R2B,PPP2R2C,MAP3K5
Sirtuin Signaling Pathway	0.926	-1.508	PFKFB3,FOXO1,SLC2A1,GADD45A,NDRG1,GADD45G,GABARAPL1,ACSS2,LDHA,HMGCS2,ATG9B
Antioxidant Action of Vitamin C	2.91	-1.89	PLBD1,PLA2G4A,STAT5A,SLC2A1,MAPK13,PLA2G7,MAPK11,SLC2A3,PAFAH1B3
LXR/RXR Activation	3.12	-1.89	SCD,TTR,HPX,FASN,NGFR,LPL,CD14,SERPINA1,FGA,IL18RAP
Coagulation System	2	-2	SERPINA1,FGA,F3,A2M
